# Supplementary material for: Potential of the Liquid Fermentation of Fishery Waste by Paenibacillus elgii for Metalloprotease Production
Source: MDPI journal article supplement (doi:10.3390/polym14132741), 2022-07-05
Supplement: s1 [file s1]

Supplementary Materials

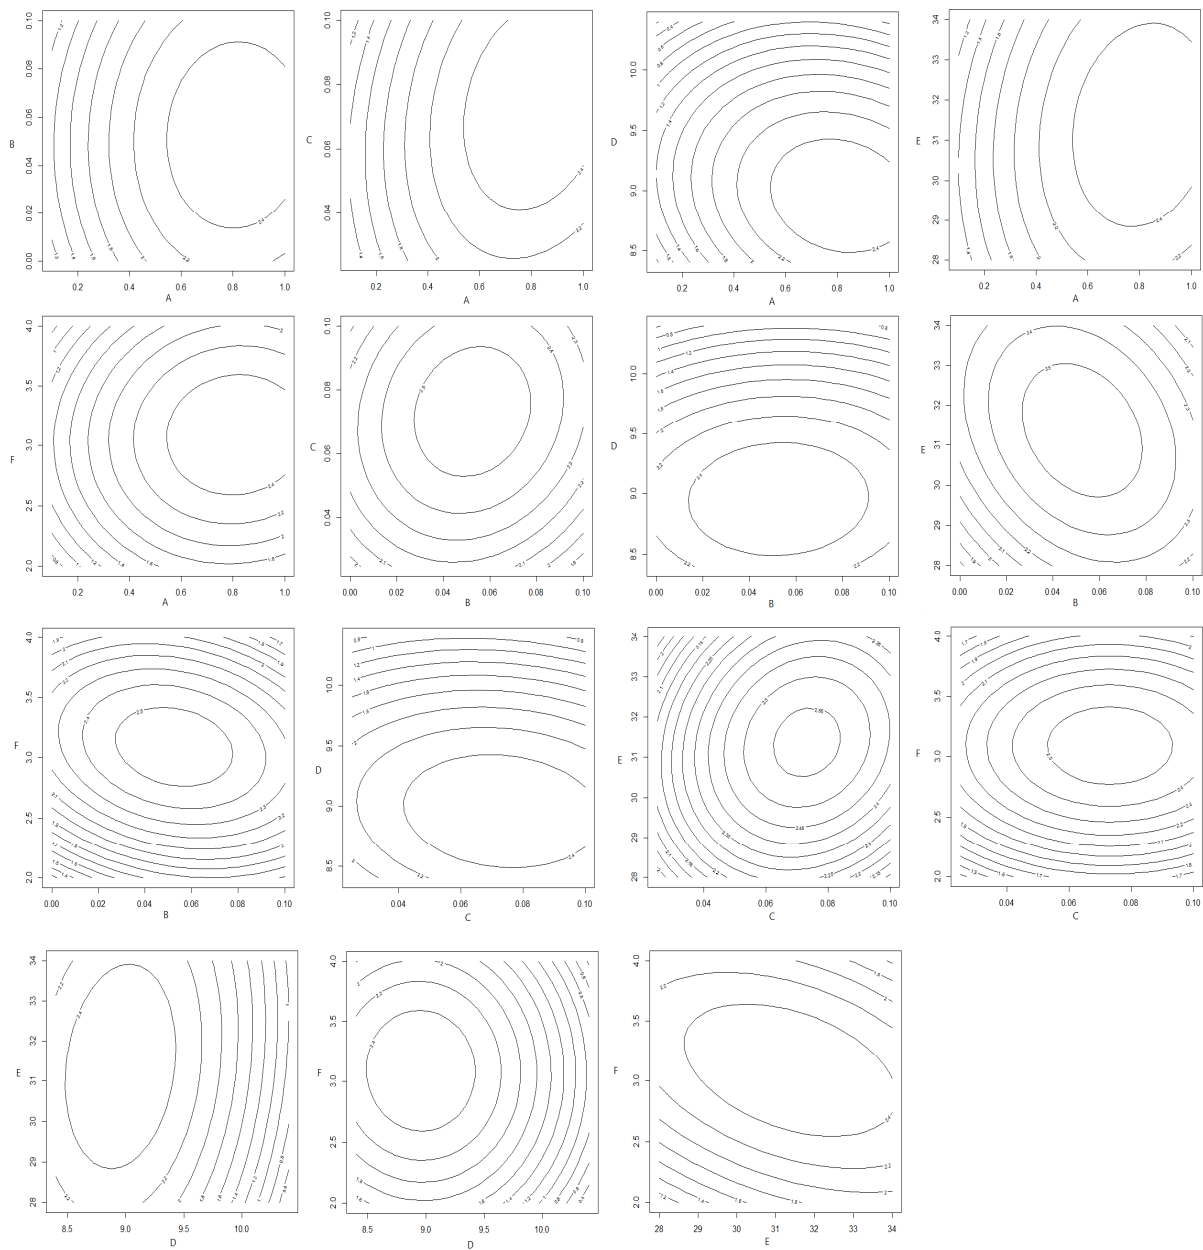

(a)

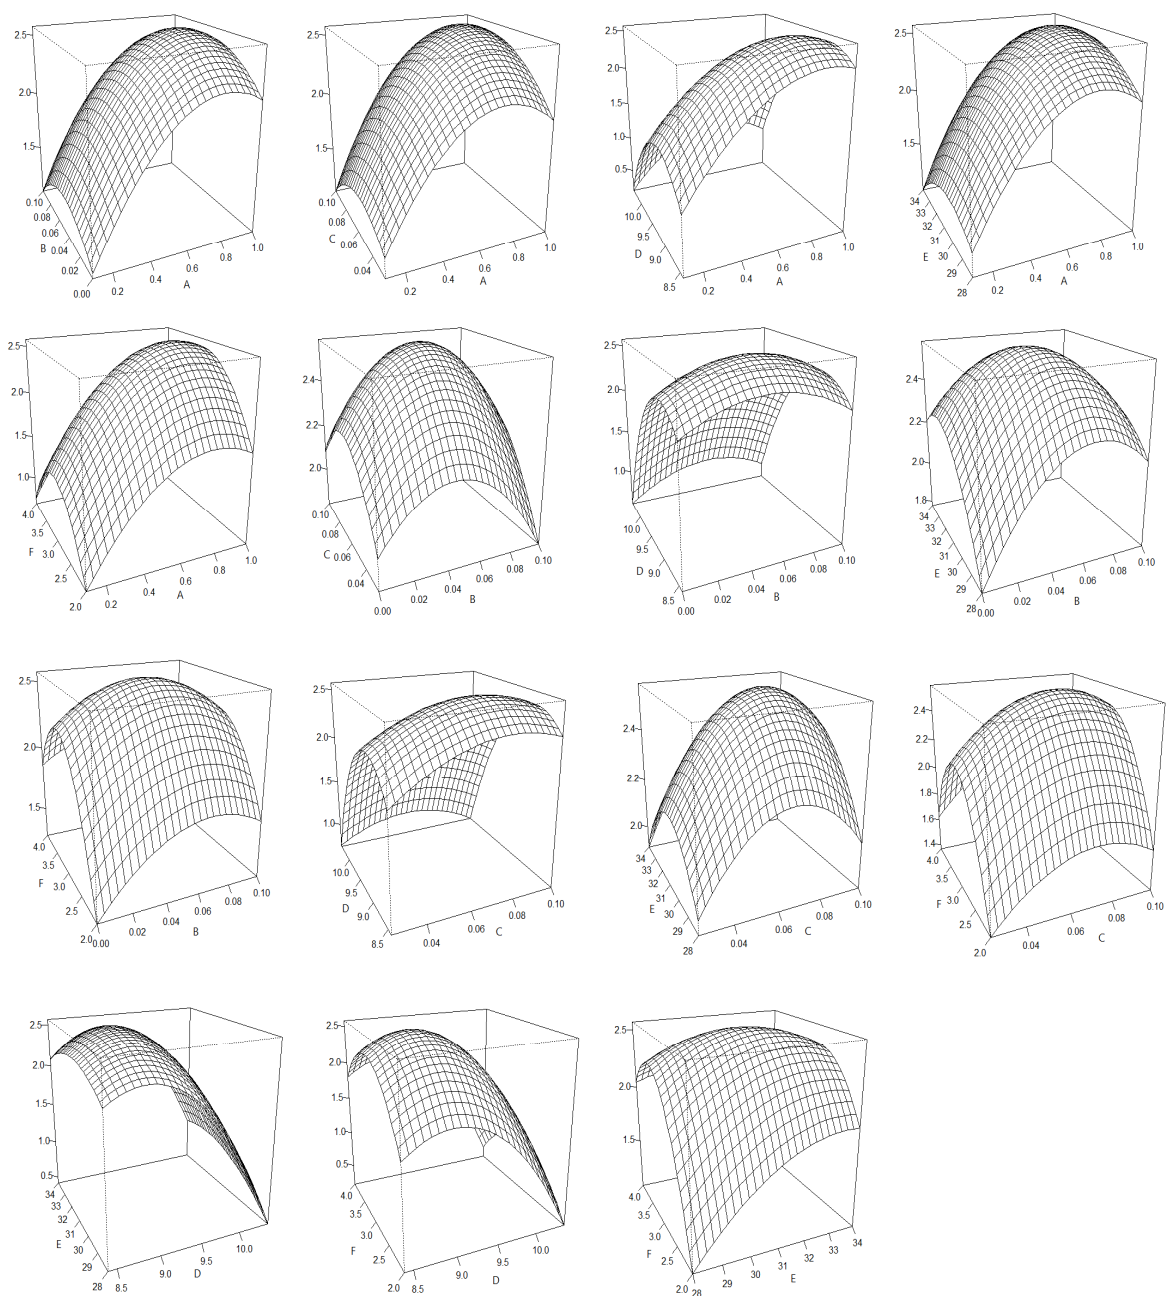

(b)

**Figure S1.** Contour plots (a) and response surface methodology plots (b) for optimization of protease production. A, THP concentration (%); B, K<sub>2</sub>HPO<sub>4</sub> concentration (%); C, MgSO<sub>4</sub> concentration (%); D, initial pH; E, incubation temperature (°C); F, incubation time (day).

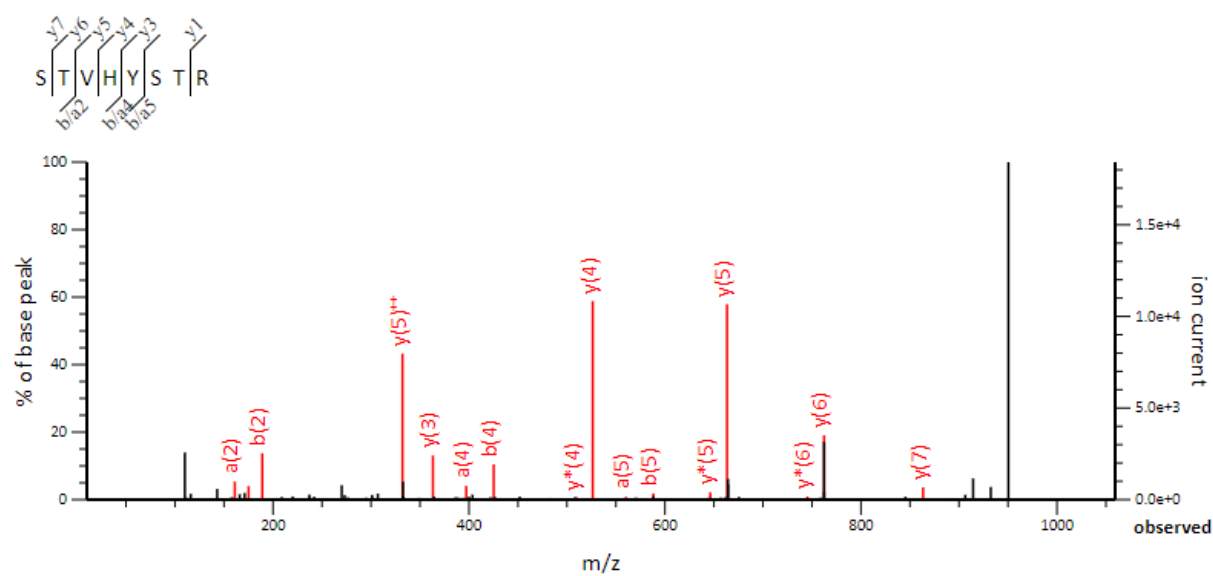

**Figure S2.** LC-MS/MS spectrum of a peptide fragment originating from *P. elgii* TKU051 protease.

**Table S1.** Experimental results of the Box-Behnken design.

| Run | Uncoded levels |      |        |      |    |   | Coded levels |    |    |    |    |    | Protease activity<br>(U/mL) |
|-----|----------------|------|--------|------|----|---|--------------|----|----|----|----|----|-----------------------------|
|     | A              | B    | C      | D    | E  | F | A            | B  | C  | D  | E  | F  |                             |
| 1   | 0.1            | 0    | 0.0625 | 8.4  | 31 | 3 | -1           | -1 | 0  | -1 | 0  | 0  | 0.949                       |
| 2   | 1              | 0    | 0.0625 | 8.4  | 31 | 3 | 1            | -1 | 0  | -1 | 0  | 0  | 1.892                       |
| 3   | 0.1            | 0.1  | 0.0625 | 8.4  | 31 | 3 | -1           | 1  | 0  | -1 | 0  | 0  | 0.765                       |
| 4   | 1              | 0.1  | 0.0625 | 8.4  | 31 | 3 | 1            | 1  | 0  | -1 | 0  | 0  | 1.904                       |
| 5   | 0.1            | 0    | 0.0625 | 10.4 | 31 | 3 | -1           | -1 | 0  | 1  | 0  | 0  | 0.083                       |
| 6   | 1              | 0    | 0.0625 | 10.4 | 31 | 3 | 1            | -1 | 0  | 1  | 0  | 0  | 0.178                       |
| 7   | 0.1            | 0.1  | 0.0625 | 10.4 | 31 | 3 | -1           | 1  | 0  | 1  | 0  | 0  | 0.148                       |
| 8   | 1              | 0.1  | 0.0625 | 10.4 | 31 | 3 | 1            | 1  | 0  | 1  | 0  | 0  | 0.289                       |
| 9   | 0.55           | 0    | 0.025  | 9.4  | 28 | 3 | 0            | -1 | -1 | 0  | -1 | 0  | 1.534                       |
| 10  | 0.55           | 0.1  | 0.025  | 9.4  | 28 | 3 | 0            | 1  | -1 | 0  | -1 | 0  | 1.809                       |
| 11  | 0.55           | 0    | 0.1    | 9.4  | 28 | 3 | 0            | -1 | 1  | 0  | -1 | 0  | 1.020                       |
| 12  | 0.55           | 0.1  | 0.1    | 9.4  | 28 | 3 | 0            | 1  | 1  | 0  | -1 | 0  | 1.720                       |
| 13  | 0.55           | 0    | 0.025  | 9.4  | 34 | 3 | 0            | -1 | -1 | 0  | 1  | 0  | 1.694                       |
| 14  | 0.55           | 0.1  | 0.025  | 9.4  | 34 | 3 | 0            | 1  | -1 | 0  | 1  | 0  | 1.473                       |
| 15  | 0.55           | 0    | 0.1    | 9.4  | 34 | 3 | 0            | -1 | 1  | 0  | 1  | 0  | 1.589                       |
| 16  | 0.55           | 0.1  | 0.1    | 9.4  | 34 | 3 | 0            | 1  | 1  | 0  | 1  | 0  | 1.514                       |
| 17  | 0.55           | 0.05 | 0.025  | 8.4  | 31 | 2 | 0            | 0  | -1 | -1 | 0  | -1 | 1.012                       |
| 18  | 0.55           | 0.05 | 0.1    | 8.4  | 31 | 2 | 0            | 0  | 1  | -1 | 0  | -1 | 1.348                       |
| 19  | 0.55           | 0.05 | 0.025  | 10.4 | 31 | 2 | 0            | 0  | -1 | 1  | 0  | -1 | 0.018                       |
| 20  | 0.55           | 0.05 | 0.1    | 10.4 | 31 | 2 | 0            | 0  | 1  | 1  | 0  | -1 | 0.091                       |
| 21  | 0.55           | 0.05 | 0.025  | 8.4  | 31 | 4 | 0            | 0  | -1 | -1 | 0  | 1  | 0.990                       |
| 22  | 0.55           | 0.05 | 0.1    | 8.4  | 31 | 4 | 0            | 0  | 1  | -1 | 0  | 1  | 1.524                       |
| 23  | 0.55           | 0.05 | 0.025  | 10.4 | 31 | 4 | 0            | 0  | -1 | 1  | 0  | 1  | 0.010                       |
| 24  | 0.55           | 0.05 | 0.1    | 10.4 | 31 | 4 | 0            | 0  | 1  | 1  | 0  | 1  | 0.008                       |
| 25  | 0.1            | 0.05 | 0.0625 | 8.4  | 28 | 3 | -1           | 0  | 0  | -1 | -1 | 0  | 0.876                       |
| 26  | 1              | 0.05 | 0.0625 | 8.4  | 28 | 3 | 1            | 0  | 0  | -1 | -1 | 0  | 1.929                       |
| 27  | 0.1            | 0.05 | 0.0625 | 10.4 | 28 | 3 | -1           | 0  | 0  | 1  | -1 | 0  | 0.079                       |
| 28  | 1              | 0.05 | 0.0625 | 10.4 | 28 | 3 | 1            | 0  | 0  | 1  | -1 | 0  | 0.099                       |
| 29  | 0.1            | 0.05 | 0.0625 | 8.4  | 34 | 3 | -1           | 0  | 0  | -1 | 1  | 0  | 0.771                       |
| 30  | 1              | 0.05 | 0.0625 | 8.4  | 34 | 3 | 1            | 0  | 0  | -1 | 1  | 0  | 1.740                       |
| 31  | 0.1            | 0.05 | 0.0625 | 10.4 | 34 | 3 | -1           | 0  | 0  | 1  | 1  | 0  | 0.057                       |
| 32  | 1              | 0.05 | 0.0625 | 10.4 | 34 | 3 | 1            | 0  | 0  | 1  | 1  | 0  | 0.973                       |
| 33  | 0.55           | 0    | 0.0625 | 9.4  | 28 | 2 | 0            | -1 | 0  | 0  | -1 | -1 | 0.032                       |
| 34  | 0.55           | 0.1  | 0.0625 | 9.4  | 28 | 2 | 0            | 1  | 0  | 0  | -1 | -1 | 0.803                       |
| 35  | 0.55           | 0    | 0.0625 | 9.4  | 34 | 2 | 0            | -1 | 0  | 0  | 1  | -1 | 1.356                       |
| 36  | 0.55           | 0.1  | 0.0625 | 9.4  | 34 | 2 | 0            | 1  | 0  | 0  | 1  | -1 | 1.417                       |
| 37  | 0.55           | 0    | 0.0625 | 9.4  | 28 | 4 | 0            | -1 | 0  | 0  | -1 | 1  | 1.528                       |
| 38  | 0.55           | 0.1  | 0.0625 | 9.4  | 28 | 4 | 0            | 1  | 0  | 0  | -1 | 1  | 1.457                       |
| 39  | 0.55           | 0    | 0.0625 | 9.4  | 34 | 4 | 0            | -1 | 0  | 0  | 1  | 1  | 1.364                       |

|    |      |      |        |     |    |   |    |   |    |   |   |    |       |
|----|------|------|--------|-----|----|---|----|---|----|---|---|----|-------|
| 40 | 0.55 | 0.1  | 0.0625 | 9.4 | 34 | 4 | 0  | 1 | 0  | 0 | 1 | 1  | 0.943 |
| 41 | 0.1  | 0.05 | 0.025  | 9.4 | 31 | 2 | -1 | 0 | -1 | 0 | 0 | -1 | 0.411 |
| 42 | 1    | 0.05 | 0.025  | 9.4 | 31 | 2 | 1  | 0 | -1 | 0 | 0 | -1 | 1.141 |
| 43 | 0.1  | 0.05 | 0.1    | 9.4 | 31 | 2 | -1 | 0 | 1  | 0 | 0 | -1 | 0.063 |
| 44 | 1    | 0.05 | 0.1    | 9.4 | 31 | 2 | 1  | 0 | 1  | 0 | 0 | -1 | 1.439 |
| 45 | 0.1  | 0.05 | 0.025  | 9.4 | 31 | 4 | -1 | 0 | -1 | 0 | 0 | 1  | 0.593 |
| 46 | 1    | 0.05 | 0.025  | 9.4 | 31 | 4 | 1  | 0 | -1 | 0 | 0 | 1  | 1.657 |
| 47 | 0.1  | 0.05 | 0.1    | 9.4 | 31 | 4 | -1 | 0 | 1  | 0 | 0 | 1  | 0.269 |
| 48 | 1    | 0.05 | 0.1    | 9.4 | 31 | 4 | 1  | 0 | 1  | 0 | 0 | 1  | 1.787 |
| 49 | 0.55 | 0.05 | 0.0625 | 9.4 | 31 | 3 | 0  | 0 | 0  | 0 | 0 | 0  | 2.076 |
| 50 | 0.55 | 0.05 | 0.0625 | 9.4 | 31 | 3 | 0  | 0 | 0  | 0 | 0 | 0  | 2.198 |
| 51 | 0.55 | 0.05 | 0.0625 | 9.4 | 31 | 3 | 0  | 0 | 0  | 0 | 0 | 0  | 2.264 |
| 52 | 0.55 | 0.05 | 0.0625 | 9.4 | 31 | 3 | 0  | 0 | 0  | 0 | 0 | 0  | 2.712 |
| 53 | 0.55 | 0.05 | 0.0625 | 9.4 | 31 | 3 | 0  | 0 | 0  | 0 | 0 | 0  | 2.137 |
| 54 | 0.55 | 0.05 | 0.0625 | 9.4 | 31 | 3 | 0  | 0 | 0  | 0 | 0 | 0  | 2.477 |

---

A, THP concentration (%); B, K<sub>2</sub>HPO<sub>4</sub> concentration (%); C, MgSO<sub>4</sub> concentration (%); D, initial pH; E, incubation temperature (°C); and F, incubation time (day).
